# Supplementary material for: Association of CD8+ T lymphocyte repertoire spreading with the severity of DRESS syndrome
Source: PubMed Central journal article supplement (PMC4649994; doi:10.1038/srep09913), 2015-04-23
Supplement: srep09913-s1.pdf [file srep09913-s1.pdf]

## Supplementary Materials

### **Association of CD8<sup>+</sup> T lymphocyte repertoire spreading with the severity of DRESS syndrome**

Jun Niu<sup>1#</sup>, Qingzhu Jia<sup>2,3#</sup>, Qingshan Ni<sup>2,3</sup>, Yi Yang<sup>2,3</sup>, Gang Chen<sup>2,3</sup>, Xichuan Yang<sup>1</sup>, Zhifang Zhai<sup>1</sup>, Haili Yu<sup>2,3</sup>, Peng Guan<sup>2,3</sup>, Regina Lin<sup>4</sup>, Zhiqiang Song<sup>1</sup>, Qi-Jing Li<sup>3,4</sup>, Fei Hao<sup>1\*</sup>, Hua Zhong<sup>1\*</sup>, Ying Wan<sup>2,3\*</sup>

<sup>1</sup>Department of Dermatology, Southwest Hospital, Third Military Medical University, Chongqing, China

<sup>2</sup>Biomedical Analysis Center, Third Military Medical University, Chongqing, China

<sup>3</sup>Chongqing Key Laboratory of Cytomics, Chongqing, China

<sup>4</sup>Department of Immunology, Duke University Medical Center, Durham, North Carolina, USA

#Jun Niu and Qingzhu Jia contributed equally as co-first authors.

\*Fei Hao, Hua Zhong, and Ying Wan are co-corresponding authors.

## Sampling of peripheral blood

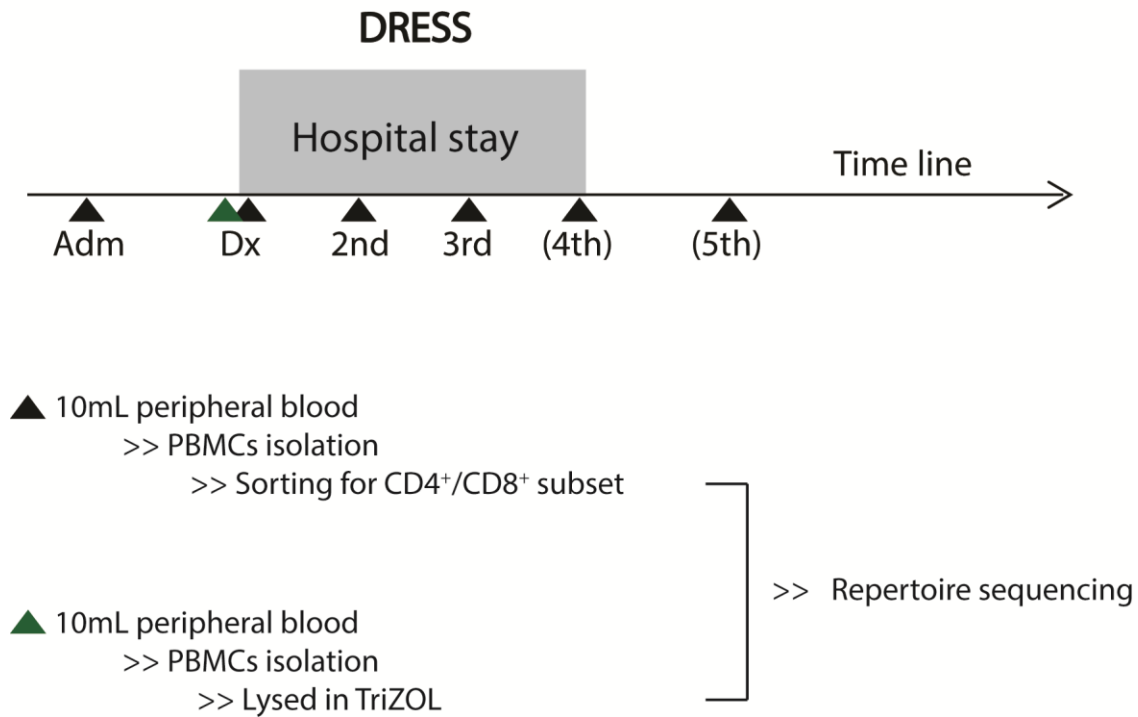

### Figure-S1. Patients and sample procurement

Schematic view of collection of blood samples from DRESS patients. Grey areas show the duration of hospital stay. Adm, administration of the culprit drug; Dx, diagnosis; brackets, sampling from only certain patients. Black triangle, sampling for sorting of CD4<sup>+</sup>/CD8<sup>+</sup> T-cell subset. Green triangle, sampling for PBMC sequencing.

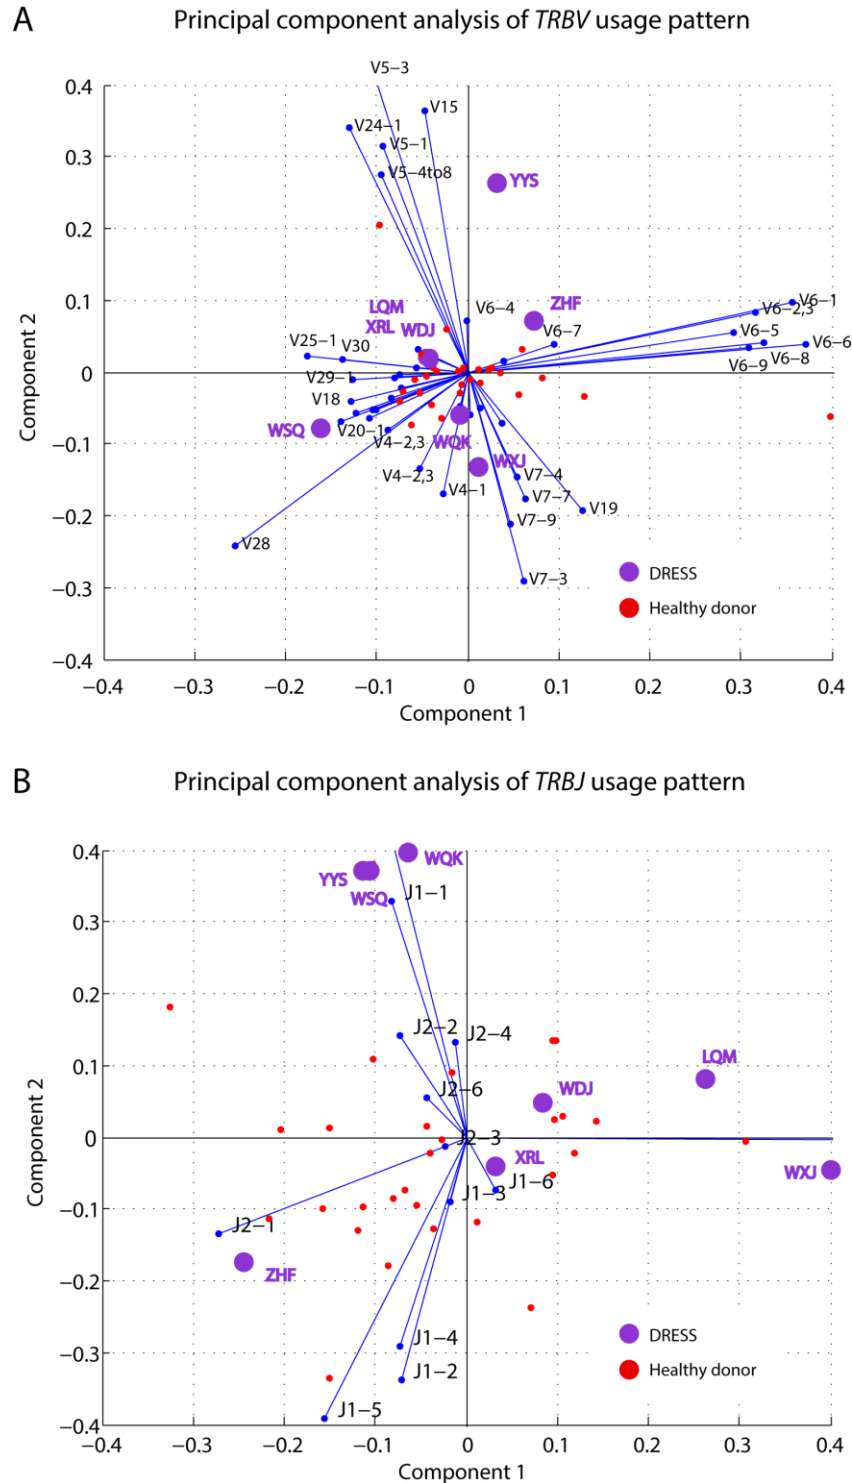

**Figure-S2. *TRBV* and *TRBJ* segment usage patterns**

Principal component analysis showed the overall usage patterns of (A) *TRBV* and (B) *TRBJ* segments for patients with DRESS and healthy donors. The scatterplot helps to visualize both the principal component coefficients for each gene segment and the principal component scores for each patient. The purple and red dots represent the PBMC repertoires from patients with DRESS and from healthy donors, respectively. Parts of the label for the V-beta segment were deleted to improve visual clarity.

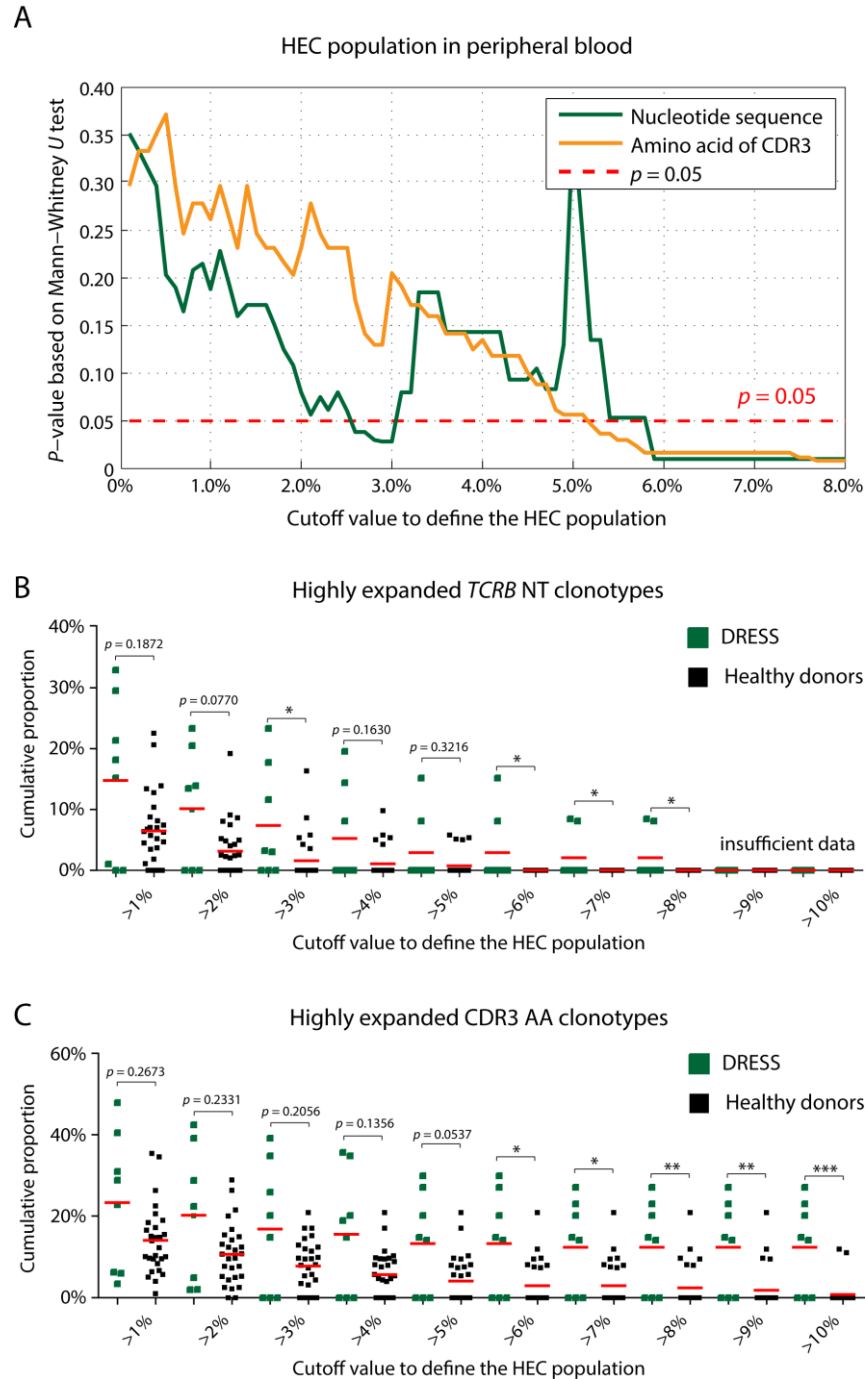

**Figure-S3. Accumulation of highly expanded clonotypes in DRESS patients**

(A) Mann–Whitney *U*-tests were used to compare the proportions of highly expanded clones (HECs) in patients and healthy donors. Significance of increased HECs in DRESS patients is represented as the *p*-value of the hypothesis test against the cutoff percentage that defined this HEC population. Calculation was performed for both the *TCRB* NT clones (defined as the T-cell population in which the nucleotide sequences in the entire *TCRB* transcript were identical) and for the CDR3 AA clones (defined as the T-cell population in which the amino acid sequence in the CDR3 region were identical). (B, C) Comparison of the proportion of expanded clones for both *TCRB* NT and CDR3 AA clones. Cutoff values for defining the HEC population are indicated on the horizontal axis (at intervals at 1%). Red bars, median values. Statistics based on Mann–Whitney *U*-tests.

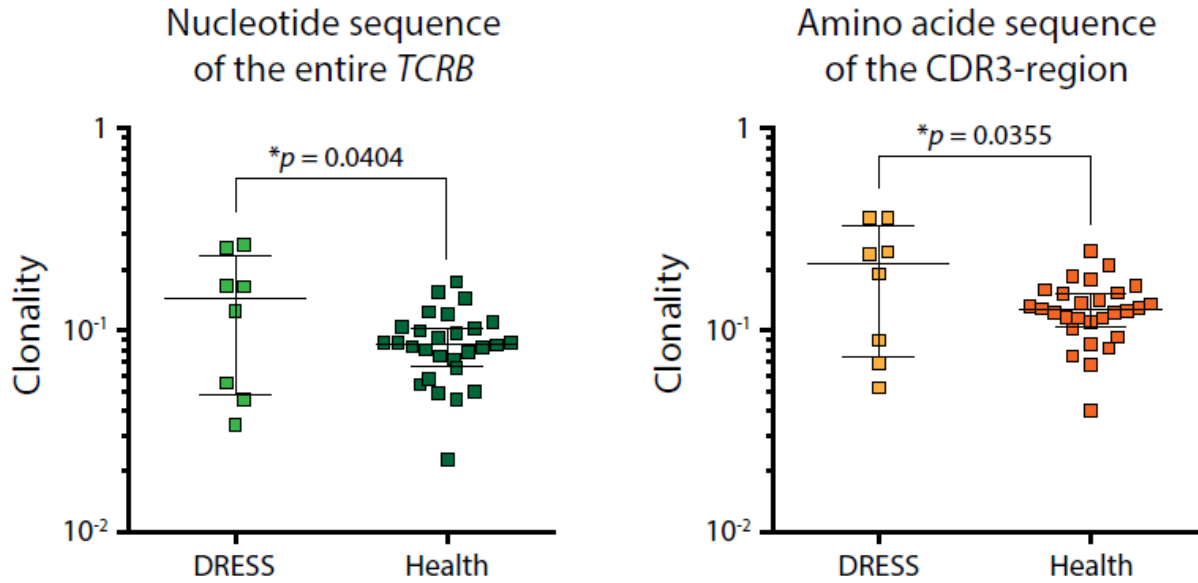

**Figure-S4. Oligo-clonality of repertoire from peripheral blood**

Dot plots showed the clonality index for DRESS cohort and condition-matched healthy donors. Higher index value, significant oligo-clonality; lower index value, prefer to poly-clonality. Left panel, for nucleotide sequence in the entire TCRB locus; right panel, for the amino acid sequence in CDR3 region.

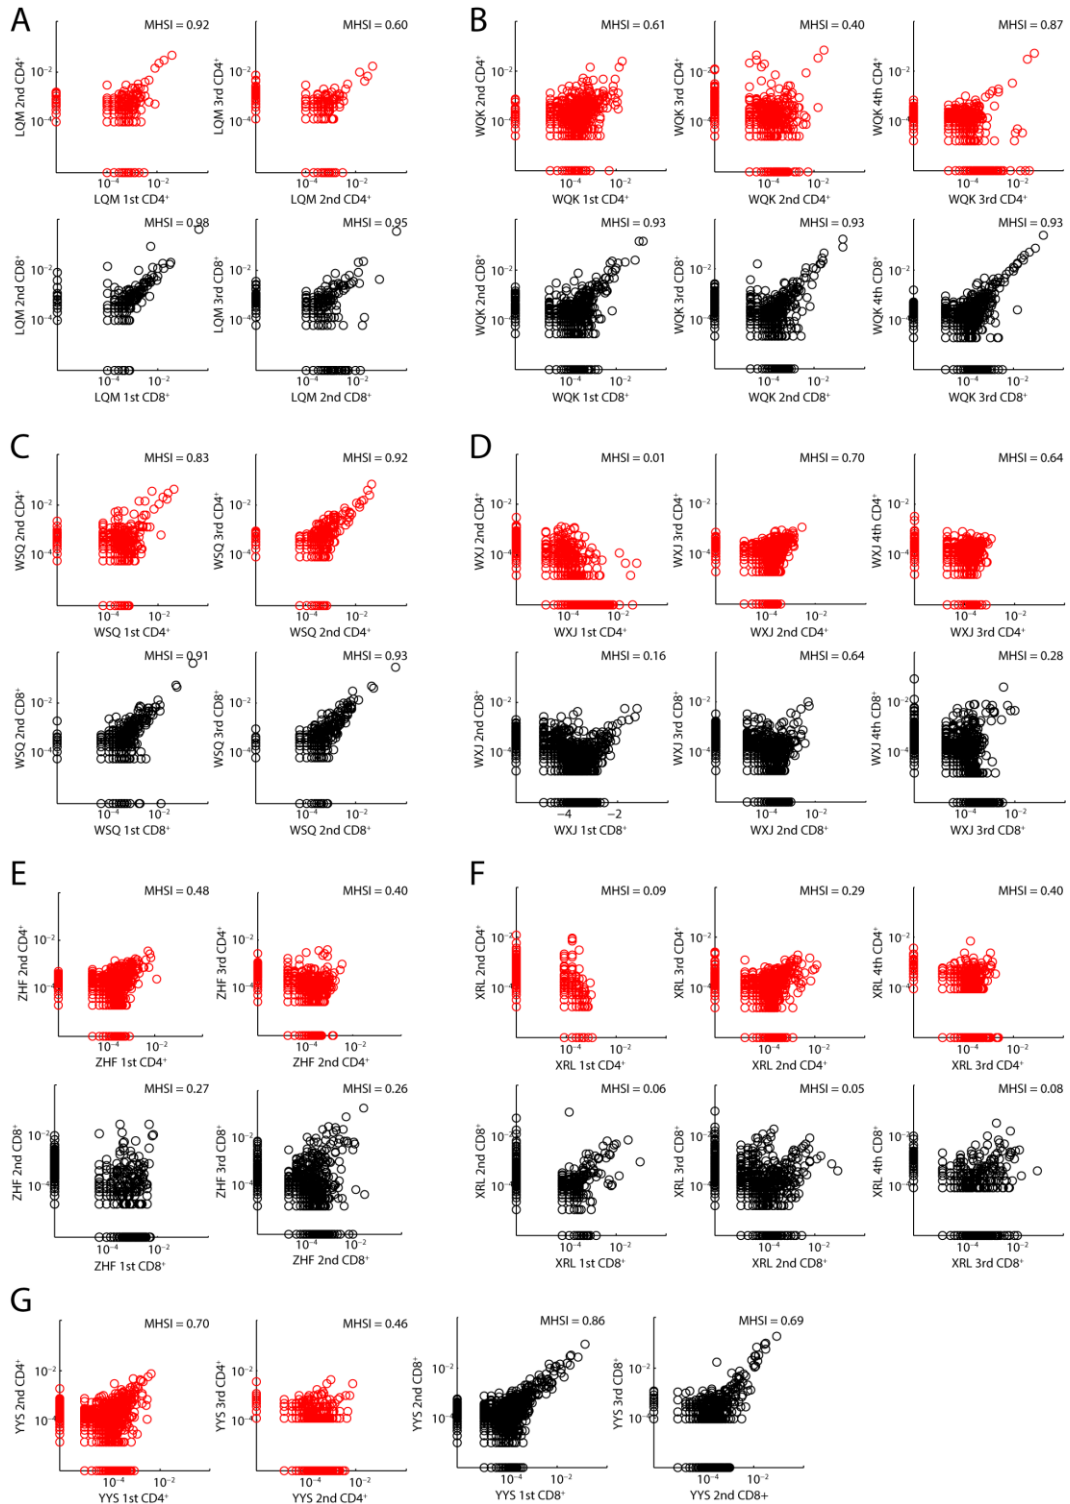

**Figure-S5. Repertoire reformation during course of DRESS**

Scatterplot showing the dynamic repertoire change for CD4<sup>+</sup> (red dots) and CD8<sup>+</sup> (black dots) T-cell clones. **(A-G)** Each dot represents a unique CDR3 AA clone and the corresponding abundance in 2 blood samples from adjacent time points. The dots on the axis indicate the clonotypes detected within a single repertoire. The MHSI is shown in the upper right corner for each panel.

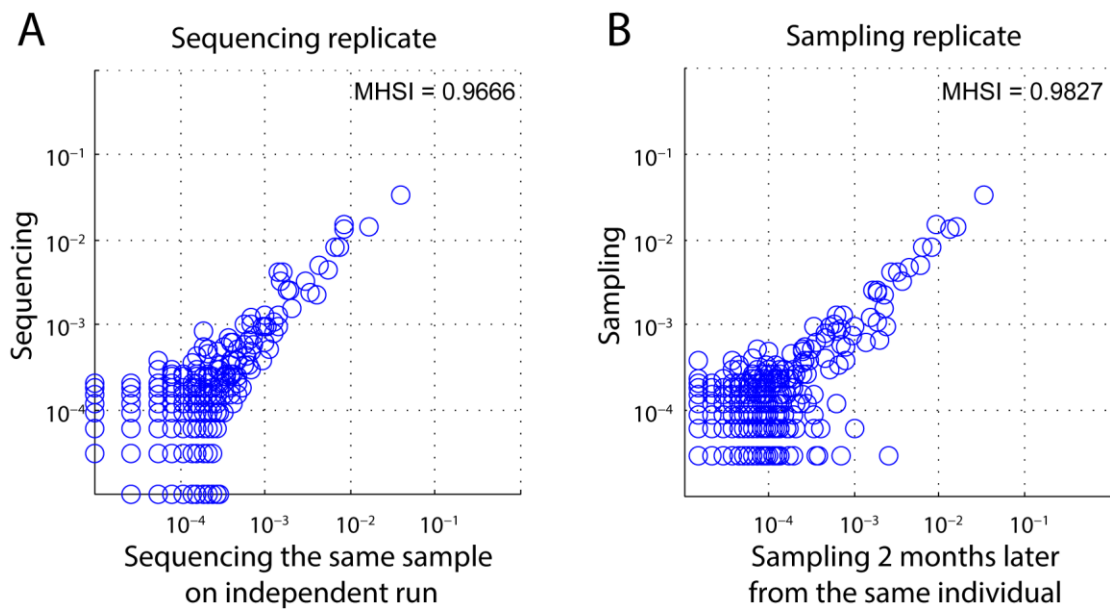

**Figure-S6. Feasibility of sequencing strategy**

Quality-control experiment to validate the reproducibility of our sequencing strategy. **(A)** Reproducibility of sequencing replicate. Peripheral blood mononuclear cells (PBMCs) were isolated from peripheral blood (10mL) obtained from a healthy donor for library construction. This library was sequenced twice independently to show the reproducibility of CDR3 AA clones. **(B)** Reproducibility of sampling replicates. PBMCs from an additional 10mL of peripheral blood were obtained from the same healthy donor at 57 days after the first sampling. The library was constructed and sequenced using the same protocol. The donor had no evidence of any immune-challenge, such as infections or medication, during this sampling interval. MHSI was calculated and shown in the upper right corner for each panel.

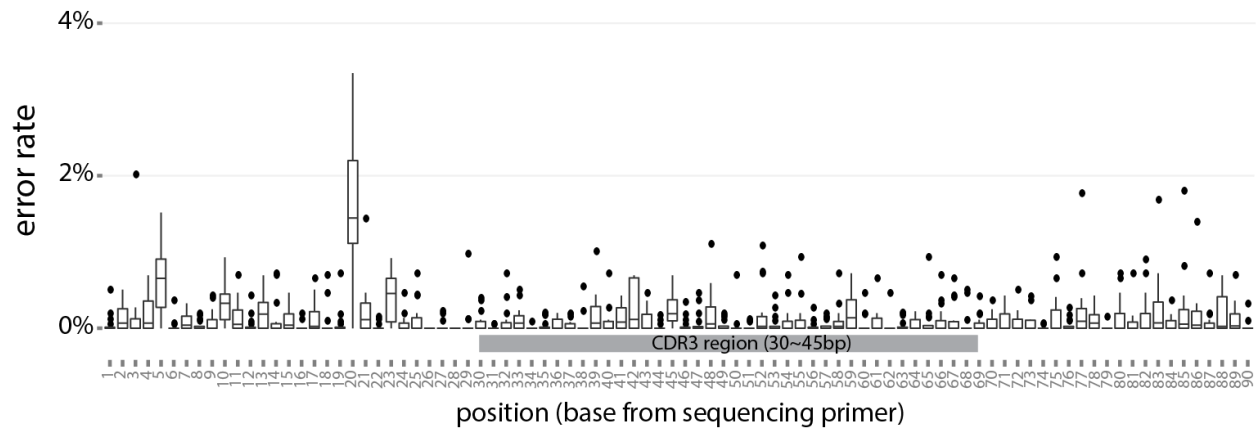

**Figure-S7. Estimation of sequencing error rate**

Error rate was estimated for sequencing reads covering the entire CDR3 region. 56 distinct PCR products were cloned into T-vector as standard template, and, sequenced independently according to identical protocol in this project. Box plot illustrated the distribution of error rate for each standard template in certain position. The overall error rate was 0.16% in the sequencing reads and 0.14% in CDR3 region.



**Table-S1.** Clinical and biological features of eight DRESS patients (at the time point of diagnosis).

|                                             | <b>LQM</b> | <b>WDJ</b> | <b>WQK</b> | <b>WSQ</b> | <b>WXJ</b> | <b>XRL</b> | <b>YYS</b> | <b>ZHF</b> |
|---------------------------------------------|------------|------------|------------|------------|------------|------------|------------|------------|
| <b>Age/gender</b>                           | 40/F       | 47/M       | 50/M       | 71/M       | 51/F       | 19/F       | 73/M       | 63/F       |
| <b>Drugs</b>                                | 1          | 2          | 1          | 1          | 3          | 4          | 5          | 6          |
| <b>Fever ≥ 38.5°C</b>                       | Yes        | Yes        | Yes        | Yes        | Yes        | Yes        | Yes        | Yes        |
| <b>Enlarged lymph nodes</b>                 | Yes        | Yes        | Yes        | No/U       | Yes        | Yes        | No/U       | Yes        |
| <b>Eosinophilia</b>                         | Yes        | Yes        | No/U       | Yes        | Yes        | Yes        | Yes        | No/U       |
| <b>Atypical lymphocytes</b>                 | Yes        | No/U       | No/U       | No/U       | No/U       | No/U       | No/U       | No/U       |
| <b>Skin involvement</b>                     |            |            |            |            |            |            |            |            |
| <b>Skin rash extent (% of skin area)</b>    | >50%       | >50%       | <50%       | >50%       | >50%       | >50%       | >50%       | >50%       |
| <b>Skin rash suggesting DRESS</b>           | Yes        | Yes        | Yes        | Yes        | Yes        | Yes        | Yes        | Yes        |
| <b>Biopsy suggesting DRESS</b>              | Yes        | No/U       | No/U       | No/U       | No/U       | No/U       | No/U       | No/U       |
| <b>Organ involvement</b>                    |            |            |            |            |            |            |            |            |
| <b>Liver</b>                                | Yes        | Yes        | Yes        | Yes        | Yes        | Yes        | Yes        | Yes        |
| <b>Kidney</b>                               | No/U       | Yes        | Yes        | No/U       | No/U       | No/U       | No/U       | No/U       |
| <b>Muscle/heart</b>                         | No/U       | No/U       | Yes        | No/U       | Yes        | No/U       | Yes        | No/U       |
| <b>Pancreas</b>                             | No/U       | No/U       | No/U       | No/U       | No/U       | No/U       | No/U       | No/U       |
| <b>Other organ</b>                          | Yes        | Yes        | No/U       | No/U       | Yes        | Yes        | No/U       | No/U       |
| <b>Resolution ≥ 15 days</b>                 | Yes        | Yes        | Yes        | Yes        | Yes        | Yes        | Yes        | Yes        |
| <b>Evaluation of other potential causes</b> |            |            |            |            |            |            |            |            |
| <b>Antinuclear antibody</b>                 | Yes        | No/U       | No/U       | No/U       | No/U       | No/U       | No/U       | No/U       |
| <b>Blood culture</b>                        | No/U       | No/U       | No/U       | No/U       | No/U       | No/U       | No/U       | No/U       |
| <b>Serology for HAV/HBV/HCV</b>             | No/U       | No/U       | No/U       | No/U       | No/U       | No/U       | No/U       | No/U       |
| <b>Chlamydia/mycoplasma</b>                 | No/U       | No/U       | No/U       | No/U       | No/U       | No/U       | No/U       | No/U       |
| <b>RegiSCAR score</b>                       | 7          | 7          | 5          | 5          | 6          | 7          | 5          | 7          |
| <b>Karnofsky score</b>                      | 70%        | 40%        | 70%        | 70%        | 50%        | 40%        | 60%        | 40%        |

**Drugs:**

1. Antibiotics
2. Allopurinol
3. Traditional Chinese Medicine
4. Lamotrigine
5. Carbamazepine
6. Sulfasalazine

**Table-S2.** Human leukocyte antigen (HLA) typing of patients with DRESS

| Patient | HLA-A*     | HLA-B*     | HLA-C*      | HLA-DRB1*     | HLA-DQB1*     | HLA-DPB1*      |
|---------|------------|------------|-------------|---------------|---------------|----------------|
| LQM     | A*02:03:01 | B*13:01:01 | C*03:04:01  | DRB1*16:02:01 | DQB1*05:02:01 | DPB1*05:01:01G |
|         | A*11:01:01 | B*15:02:01 | C*08:01:01G | DRB1*16:02:01 | DQB1*05:02:01 | DPB1*05:01:01G |
| WDJ     | A*24:02    | B*13:02:01 | C*03:02     | DRB1*07:01:01 | DQB1*02:01:01 | DPB1*02:01:02G |
|         | A*30:01:01 | B*58:01:01 | C*06:02:01G | DRB1*13:02:01 | DQB1*06:09:01 | DPB1*02:01:02G |
| WQK     | A*24:02    | B*15:27:01 | C*03:04:01  | DRB1*04:05:01 | DQB1*03:01:01 | DPB1*05:01:01G |
|         | A*24:02    | B*40:01    | C*04:01:01G | DRB1*11:01:01 | DQB1*04:01:01 | DPB1*13:01:01G |
| WSQ     | A*02:07:01 | B*46:01:01 | C*01:02:01G | DRB1*14:04    | DQB1*05:02:01 | DPB1*02:01:02G |
|         | A*03:01:01 | B*51:01:01 | C*14:02:01  | DRB1*16:02:01 | DQB1*05:03:01 | DPB1*05:01:01G |
| WXJ     | A*02:07:01 | B*15:02:01 | C*01:02:01G | DRB1*09:01:02 | DQB1*03:01:01 | DPB1*02:02     |
|         | A*24:02    | B*46:01:01 | C*08:01:01G | DRB1*12:02:01 | DQB1*03:03:02 | DPB1*02:02     |
| XRL     | A*11:01:01 | B*13:01:01 | C*03:04:01  | DRB1*15:01    | DQB1*06:01:01 | DPB1*05:01:01G |
|         | A*11:01:01 | B*13:01:01 | C*03:04:01  | DRB1*15:01    | DQB1*06:01:01 | DPB1*14:01     |
| YYS     | A*11:01:01 | B*08:01    | C*03:04:01  | DRB1*09:01:02 | DQB1*03:03:02 | DPB1*02:01:02G |
|         | A*24:02    | B*13:01:01 | C*07:02:01G | DRB1*13:02:01 | DQB1*06:04:01 | DPB1*05:01:01G |
| ZHF     | A*11:01:01 | B*13:01:01 | C*07:02:01G | DRB1*12:02:01 | DQB1*03:01:01 | DPB1*05:01:01G |
|         | A*11:01:01 | B*15:02:01 | C*08:01:01G | DRB1*13:12:01 | DQB1*03:01:01 | DPB1*05:01:01G |

**Table-S3.** Summary of sequencing

| <b>Patients</b> | <b>Sampling</b> | <b>Compartment</b> | <b>Reads</b> | <b>Unique TCRB NT clones</b> | <b>Unique CDR3 AA clones</b> |
|-----------------|-----------------|--------------------|--------------|------------------------------|------------------------------|
| <b>LQM</b>      | <b>First</b>    | CD4+               | 10205        | 7803                         | 5796                         |
|                 |                 | CD8+               | 10449        | 3218                         | 2292                         |
|                 |                 | PBMC               | 21063        | 17272                        | 15538                        |
|                 | <b>Second</b>   | CD4+               | 9513         | 7291                         | 5585                         |
|                 |                 | CD8+               | 10274        | 2835                         | 1917                         |
|                 | <b>Third</b>    | CD4+               | 7464         | 6096                         | 4866                         |
| CD8+            |                 | 16012              | 7528         | 5244                         |                              |
| <b>WDJ</b>      | <b>First</b>    | CD4+               | 49196        | 28685                        | 16601                        |
|                 |                 | CD8+               | 63599        | 20810                        | 9435                         |
|                 |                 | PBMC               | 32132        | 24513                        | 21314                        |
|                 | <b>Second</b>   | CD4+               | 64836        | 44988                        | 32562                        |
|                 |                 | CD8+               | 95138        | 32449                        | 17988                        |
|                 | <b>Third</b>    | CD4+               | 42660        | 32836                        | 25229                        |
|                 |                 | CD8+               | 41827        | 14816                        | 9761                         |
|                 | <b>Forth</b>    | CD4+               | 58632        | 40017                        | 29664                        |
|                 |                 | CD8+               | 42551        | 9884                         | 3866                         |
|                 | <b>Fifth</b>    | CD4+               | 126374       | 81816                        | 63147                        |
|                 |                 | CD8+               | 36184        | 12384                        | 8723                         |
|                 | <b>WQK</b>      | <b>First</b>       | CD4+         | 42341                        | 25907                        |
| CD8+            |                 |                    | 47034        | 18895                        | 14060                        |
| PBMC            |                 |                    | 30088        | 17351                        | 16063                        |
| <b>Second</b>   |                 | CD4+               | 40572        | 29517                        | 22221                        |
|                 |                 | CD8+               | 36808        | 11980                        | 6945                         |
| <b>Third</b>    |                 | CD4+               | 39755        | 19505                        | 12508                        |
|                 |                 | CD8+               | 48155        | 13688                        | 7086                         |
| <b>Forth</b>    |                 | CD4+               | 60794        | 38604                        | 23073                        |
|                 |                 | CD8+               | 53545        | 12646                        | 6481                         |
| <b>WSQ</b>      |                 | <b>First</b>       | CD4+         | 15277                        | 10725                        |
|                 | CD8+            |                    | 20236        | 10911                        | 8850                         |
|                 | PBMC            |                    | 17558        | 6916                         | 4679                         |
|                 | <b>Second</b>   | CD4+               | 17264        | 11294                        | 8635                         |
|                 |                 | CD8+               | 17776        | 5496                         | 3756                         |
|                 | <b>Third</b>    | CD4+               | 11596        | 7406                         | 5543                         |
| CD8+            |                 | 15560              | 5576         | 3790                         |                              |
| <b>WXJ</b>      | <b>First</b>    | CD4+               | 67134        | 20205                        | 9023                         |
|                 |                 | CD8+               | 85472        | 27975                        | 14450                        |
|                 |                 | PBMC               | 54080        | 20716                        | 16394                        |
|                 | <b>Second</b>   | CD4+               | 68129        | 46737                        | 29525                        |
|                 |                 | CD8+               | 55181        | 38607                        | 25906                        |
|                 | <b>Third</b>    | CD4+               | 48242        | 37826                        | 26539                        |
|                 |                 | CD8+               | 54170        | 27183                        | 12719                        |
|                 | <b>Forth</b>    | CD4+               | 62289        | 53138                        | 43651                        |
|                 |                 | CD8+               | 71965        | 36201                        | 26143                        |
|                 | <b>XRL</b>      | <b>First</b>       | CD4+         | 11621                        | 11251                        |
| CD8+            |                 |                    | 14824        | 11071                        | 9549                         |
| PBMC            |                 |                    | 42873        | 37427                        | 34533                        |
| <b>Second</b>   |                 | CD4+               | 61152        | 44894                        | 35950                        |

|                         |               |      |        |       |       |
|-------------------------|---------------|------|--------|-------|-------|
|                         |               | CD8+ | 94622  | 56998 | 44575 |
|                         | <b>Third</b>  | CD4+ | 63636  | 51971 | 42574 |
|                         |               | CD8+ | 65379  | 22589 | 12545 |
|                         | <b>Forth</b>  | CD4+ | 11221  | 9853  | 7993  |
|                         |               | CD8+ | 12760  | 9454  | 6663  |
| <b>YYS</b>              | <b>First</b>  | CD4+ | 106119 | 57741 | 26726 |
|                         |               | CD8+ | 81671  | 23756 | 12385 |
|                         |               | PBMC | 56797  | 21731 | 18792 |
|                         | <b>Second</b> | CD4+ | 73220  | 34889 | 14722 |
|                         |               | CD8+ | 106823 | 35950 | 15790 |
|                         | <b>Third</b>  | CD4+ | 8290   | 7768  | 6821  |
|                         |               | CD8+ | 11642  | 3070  | 2164  |
| <b>ZHF</b>              | <b>First</b>  | CD4+ | 40048  | 29016 | 21934 |
|                         |               | CD8+ | 18893  | 5431  | 2339  |
|                         |               | PBMC | 26122  | 15777 | 13086 |
|                         | <b>Second</b> | CD4+ | 52990  | 36918 | 23675 |
|                         |               | CD8+ | 47756  | 23512 | 12734 |
|                         | <b>Third</b>  | CD4+ | 38631  | 32496 | 26602 |
|                         |               | CD8+ | 68936  | 17108 | 11061 |
| <b>Healthy Donor 01</b> |               | PBMC | 83356  | 56904 | 44612 |
| <b>Healthy Donor 02</b> |               | PBMC | 89660  | 62263 | 49785 |
| <b>Healthy Donor 03</b> |               | PBMC | 72983  | 61195 | 51862 |
| <b>Healthy Donor 04</b> |               | PBMC | 95828  | 61886 | 46700 |
| <b>Healthy Donor 05</b> |               | PBMC | 88744  | 55842 | 38909 |
| <b>Healthy Donor 06</b> |               | PBMC | 97239  | 73139 | 60170 |
| <b>Healthy Donor 07</b> |               | PBMC | 50024  | 36334 | 30728 |
| <b>Healthy Donor 08</b> |               | PBMC | 69501  | 47925 | 36702 |
| <b>Healthy Donor 09</b> |               | PBMC | 64891  | 46845 | 36910 |
| <b>Healthy Donor 10</b> |               | PBMC | 69883  | 48493 | 40772 |
| <b>Healthy Donor 11</b> |               | PBMC | 73451  | 50653 | 40555 |
| <b>Healthy Donor 12</b> |               | PBMC | 32074  | 24937 | 21588 |
| <b>Healthy Donor 13</b> |               | PBMC | 60295  | 32517 | 26047 |
| <b>Healthy Donor 14</b> |               | PBMC | 61029  | 43031 | 35595 |
| <b>Healthy Donor 15</b> |               | PBMC | 59184  | 30824 | 26689 |
| <b>Healthy Donor 16</b> |               | PBMC | 67278  | 44504 | 36794 |
| <b>Healthy Donor 17</b> |               | PBMC | 60091  | 41444 | 32231 |
| <b>Healthy Donor 18</b> |               | PBMC | 65424  | 45855 | 35876 |
| <b>Healthy Donor 19</b> |               | PBMC | 51556  | 41619 | 35818 |
| <b>Healthy Donor 20</b> |               | PBMC | 80494  | 48362 | 39947 |
| <b>Healthy Donor 21</b> |               | PBMC | 59422  | 39608 | 31930 |
| <b>Healthy Donor 22</b> |               | PBMC | 61518  | 36000 | 27713 |
| <b>Healthy Donor 23</b> |               | PBMC | 46552  | 30298 | 25267 |
| <b>Healthy Donor 24</b> |               | PBMC | 35508  | 22306 | 17584 |
| <b>Healthy Donor 25</b> |               | PBMC | 55941  | 26955 | 22165 |
| <b>Healthy Donor 26</b> |               | PBMC | 15743  | 10578 | 9321  |
| <b>Healthy Donor 27</b> |               | PBMC | 33172  | 23049 | 19368 |
| <b>Healthy Donor 28</b> |               | PBMC | 42544  | 28430 | 17399 |

**Table-S4.** Persistent and newly dominant clones (merged from TOP20 clone at each sampling).

| Patient               | Sampling |         |         |        |        | Persistent               |
|-----------------------|----------|---------|---------|--------|--------|--------------------------|
|                       | LQM      | First   | Second  | Third  |        | TCPI <sub>20=20/32</sub> |
| 'CAAAGWPPSEQY'        | 0.325%   | 0.292%  | 0.156%  |        |        | Yes                      |
| 'CAISEGDSPYEQY'       | 0.124%   | 0.117%  | 0.256%  |        |        | Yes                      |
| 'CAIESTRNQPQH'        | 0.105%   | 0.146%  | 0.731%  |        |        | Yes                      |
| 'CASSAGELF'           | 1.034%   | 1.168%  | 0.768%  |        |        | Yes                      |
| 'CASSETSGSFGTGELF'    | N.D.     | N.D.    | 0.256%  |        |        |                          |
| 'CASSETTVHYEGAF'      | 1.771%   | 1.197%  | 1.980%  |        |        | Yes                      |
| 'CASSFASVGNEQF'       | 3.168%   | 2.073%  | 0.012%  |        |        | Yes                      |
| 'CASSFEAGTYGYT'       | 0.010%   | 1.392%  | N.D.    |        |        |                          |
| 'CASSISENTEAF'        | 0.450%   | 0.399%  | N.D.    |        |        |                          |
| 'CASSLAGSTDTQY'       | 2.909%   | 1.713%  | 0.006%  |        |        | Yes                      |
| 'CASSLEQTTTRTDTQY'    | 0.488%   | 0.360%  | 0.181%  |        |        | Yes                      |
| 'CASSLETQY'           | 0.354%   | 0.467%  | N.D.    |        |        |                          |
| 'CASSLGASYEQY'        | 44.789%  | 41.493% | 33.163% |        |        | Yes                      |
| 'CASSLGNEQF'          | N.D.     | N.D.    | 0.356%  |        |        |                          |
| 'CASSLGPPSEQY'        | 0.584%   | 0.623%  | 0.294%  |        |        | Yes                      |
| 'CASSLGQITDTQY'       | 0.412%   | 0.243%  | N.D.    |        |        |                          |
| 'CASSLSGFGTDTQY'      | 0.517%   | 0.331%  | N.D.    |        |        |                          |
| 'CASSLTFHQQETQY'      | 0.077%   | 0.068%  | 0.412%  |        |        | Yes                      |
| 'CASSNLGRPTYTPLSYEQY' | 0.182%   | 0.944%  | N.D.    |        |        |                          |
| 'CASSNPSFNQPQH'       | 0.364%   | 0.311%  | 0.250%  |        |        | Yes                      |
| 'CASSPGLPYEQY'        | 0.278%   | 0.195%  | 0.287%  |        |        | Yes                      |
| 'CASSQDEGLRHGYT'      | N.D.     | 0.769%  | 0.337%  |        |        |                          |
| 'CASSQVASGSWGDQY'     | N.D.     | 0.370%  | 0.468%  |        |        |                          |
| 'CASSRGQRSTDTQY'      | 0.134%   | 0.234%  | 0.275%  |        |        | Yes                      |
| 'CASSRPSGTQY'         | 1.589%   | 1.879%  | 2.261%  |        |        | Yes                      |
| 'CASSSTDPGLPYNEQF'    | 0.268%   | 0.321%  | 0.250%  |        |        | Yes                      |
| 'CASSWGPPSEQY'        | 1.034%   | 0.526%  | 0.593%  |        |        | Yes                      |
| 'CASSYAYTDTQY'        | 0.488%   | 0.088%  | N.D.    |        |        |                          |
| 'CASSYGQGNTEAF'       | 0.536%   | 8.585%  | 0.418%  |        |        | Yes                      |
| 'CASSYSPGDPLGAF'      | 0.900%   | 0.370%  | N.D.    |        |        |                          |
| 'CASSYSRQGSHEQY'      | 0.679%   | 0.516%  | 0.269%  |        |        | Yes                      |
| 'CSNRTGTNSGNTIY'      | 0.651%   | 1.285%  | 0.281%  |        |        | Yes                      |
| WDJ                   | First    | Second  | Third   | Fourth | Fifth  | TCPI <sub>20=27/68</sub> |
| 'CAGQEREAAGELF'       | 0.192%   | 0.092%  | 0.146%  | N.D.   | 1.155% |                          |
| 'CAISESAGETEYQY'      | 0.000%   | 0.000%  | 0.000%  | N.D.   | 0.627% |                          |
| 'CAISESQTDTQY'        | 0.330%   | 0.179%  | 0.270%  | 0.099% | 1.078% | Yes                      |
| 'CASARDEQY'           | 0.024%   | 0.996%  | 1.657%  | 0.197% | 1.354% | Yes                      |
| 'CASEPRDRGWNEQF'      | N.D.     | N.D.    | N.D.    | 0.282% | N.D.   |                          |
| 'CASGQGGDEQY'         | 0.035%   | 0.059%  | 0.100%  | 0.019% | 1.727% | Yes                      |
| 'CASGVTGGSTDTQY'      | 0.520%   | 0.075%  | 0.019%  | N.D.   | N.D.   |                          |

|                     |        |        |        |        |         |     |
|---------------------|--------|--------|--------|--------|---------|-----|
| 'CASREENTGELF'      | 2.115% | 0.564% | 0.416% | 0.122% | 0.006%  | Yes |
| 'CASRTGTSGSYEQY'    | 0.486% | 0.060% | 0.022% | N.D.   | N.D.    |     |
| 'CASSALGGILSYNEQF'  | 0.700% | 0.077% | 0.036% | 0.012% | N.D.    |     |
| 'CASSAWGNEQY'       | 0.006% | 0.009% | 0.002% | 0.334% | 0.503%  | Yes |
| 'CASSDINEQF'        | 0.014% | 0.005% | N.D.   | 0.277% | N.D.    |     |
| 'CASSEATSGSLGKETQY' | N.D.   | 0.562% | 0.237% | N.D.   | 0.008%  |     |
| 'CASSEEGGSGANVLT'   | 0.013% | 0.057% | 0.084% | N.D.   | 0.699%  |     |
| 'CASSFEGPGELF'      | N.D.   | 0.579% | 0.739% | 0.432% | 0.229%  |     |
| 'CASSFGTTNTGELF'    | 3.728% | 1.639% | 2.233% | 0.219% | 0.047%  | Yes |
| 'CASSFPSGSRDEQY'    | N.D.   | 0.736% | 2.149% | 0.092% | 0.033%  |     |
| 'CASSFSSNQPQH'      | 0.582% | 0.215% | 0.182% | N.D.   | 0.403%  |     |
| 'CASSHTGELF'        | 0.030% | 0.117% | 0.375% | 0.026% | 3.789%  | Yes |
| 'CASSIGAGSNQPQH'    | N.D.   | 1.072% | 1.592% | 0.259% | 0.055%  |     |
| 'CASSLASETQY'       | 0.008% | 2.487% | 2.883% | 0.879% | 0.069%  | Yes |
| 'CASSLATAETQY'      | 0.420% | 0.027% | 0.029% | N.D.   | N.D.    |     |
| 'CASSLEQGTGELF'     | 0.489% | 0.145% | 0.201% | 0.026% | 0.003%  | Yes |
| 'CASSLGGQGYEQY'     | N.D.   | 0.001% | N.D.   | 0.115% | 3.073%  |     |
| 'CASSLGLTGNEQF'     | 0.014% | 0.269% | 0.605% | 0.047% | 0.080%  | Yes |
| 'CASSLGMARSSYEQY'   | N.D.   | 1.418% | 1.078% | 0.122% | 0.265%  |     |
| 'CASSLQQSQETQY'     | 0.681% | 0.054% | 0.031% | N.D.   | N.D.    |     |
| 'CASSLSGTNPWPYEQY'  | 0.011% | 1.345% | 2.785% | 1.269% | 0.354%  | Yes |
| 'CASSLTCQSSRRGYT'   | 0.560% | 0.362% | 0.244% | N.D.   | N.D.    |     |
| 'CASSLTINTGELF'     | N.D.   | 0.022% | 0.571% | 0.115% | 0.099%  |     |
| 'CASSLVAGGGETQY'    | N.D.   | 0.001% | N.D.   | N.D.   | 0.879%  |     |
| 'CASSLWGTSNYGYT'    | 0.017% | 0.748% | 1.054% | 0.188% | 0.061%  | Yes |
| 'CASSPFYGGYGYEQY'   | N.D.   | 0.502% | 0.598% | 0.026% | 0.006%  |     |
| 'CASSPGENEQF'       | 0.042% | 0.013% | N.D.   | 0.505% | N.D.    |     |
| 'CASSPGLAEYNEQF'    | 1.025% | 0.293% | 0.215% | 0.230% | 0.006%  | Yes |
| 'CASSPPGLVDNEQF'    | 0.190% | 2.142% | 3.287% | 2.879% | 1.362%  | Yes |
| 'CASSPRRYNEQF'      | N.D.   | 0.628% | 0.693% | N.D.   | 0.011%  |     |
| 'CASSPWTTEAF'       | 0.050% | 0.034% | 0.084% | 0.148% | 2.777%  | Yes |
| 'CASSQDRATGELF'     | 0.019% | 0.027% | 0.091% | 0.508% | 0.279%  | Yes |
| 'CASSQDTGGNQPQH'    | N.D.   | 1.948% | 4.748% | 0.338% | 0.083%  |     |
| 'CASSQESGNTEAF'     | 0.168% | 0.171% | 0.301% | 1.873% | 10.488% | Yes |
| 'CASSQLQGSNQPQH'    | N.D.   | N.D.   | N.D.   | N.D.   | 0.553%  |     |
| 'CASSSAGGPAETQY'    | 0.325% | 0.471% | 0.751% | 0.101% | 0.003%  | Yes |
| 'CASSSLIAGAGNEQF'   | N.D.   | 0.048% | 0.990% | 0.367% | 0.122%  |     |
| 'CASSSSTEAF'        | 0.042% | 0.017% | 0.022% | 0.226% | 0.614%  | Yes |
| 'CASSTGPSFTGELF'    | 0.307% | 0.057% | 0.088% | 0.160% | 9.189%  | Yes |
| 'CASSTGTSGSEQY'     | N.D.   | N.D.   | N.D.   | 0.296% | N.D.    |     |
| 'CASSTRQGTGYT'      | 5.035% | 0.714% | 0.404% | 0.148% | 0.146%  | Yes |
| 'CASSVGGLPGDEQF'    | 0.027% | 0.011% | 0.010% | N.D.   | 1.545%  |     |
| 'CASSWKQSAGELF'     | 0.042% | 0.063% | 0.103% | 0.402% | 1.501%  | Yes |

| 'CASSWTSPLPDEQY'    | 0.008%       | N.D.          | N.D.         | 0.282%        | N.D.   |                                |
|---------------------|--------------|---------------|--------------|---------------|--------|--------------------------------|
| 'CASSYFGQGSdTQY'    | 0.428%       | 0.054%        | 0.038%       | 0.169%        | 0.011% | Yes                            |
| 'CASSYGGSTDTQY'     | 0.478%       | 0.225%        | 0.232%       | N.D.          | N.D.   |                                |
| 'CASSYLGQGSdIQY'    | 1.299%       | 0.107%        | 0.060%       | 0.016%        | 0.008% | Yes                            |
| 'CASSYMAGQPQH'      | 0.992%       | 0.503%        | 0.292%       | N.D.          | 0.025% |                                |
| 'CASSYNPLVYEQY'     | N.D.         | 0.520%        | 0.299%       | N.D.          | 0.019% |                                |
| 'CASSYRLGTGVSNPQH'  | N.D.         | 0.596%        | 0.098%       | 0.016%        | 0.006% |                                |
| 'CASSYRTDPGELF'     | 0.362%       | 0.057%        | 0.012%       | N.D.          | N.D.   |                                |
| 'CASSYSLSFHNEQF'    | N.D.         | N.D.          | N.D.         | 0.284%        | N.D.   |                                |
| 'CASSYSRDNEQF'      | N.D.         | N.D.          | N.D.         | 0.289%        | N.D.   |                                |
| 'CASSYTPGESYEQY'    | 1.005%       | 0.279%        | 0.160%       | N.D.          | N.D.   |                                |
| 'CASSYVLNTEAF'      | 0.791%       | 0.148%        | 0.043%       | N.D.          | N.D.   |                                |
| 'CASTLDRERRSNQPQH'  | 0.002%       | 0.311%        | 1.050%       | 0.028%        | 1.998% | Yes                            |
| 'CASTLGGNQPQH'      | 0.516%       | 0.164%        | 0.201%       | 0.054%        | N.D.   |                                |
| 'CASTTSIYNEQF'      | N.D.         | 0.003%        | N.D.         | 0.303%        | N.D.   |                                |
| 'CATKKGIEAF'        | 0.041%       | 7.662%        | 8.351%       | 0.369%        | 0.174% | Yes                            |
| 'CATSRDTLAGAPQDTQY' | 0.077%       | 0.037%        | 0.093%       | 0.414%        | 1.860% | Yes                            |
| 'CSARPNEQY'         | 0.005%       | 0.015%        | 0.038%       | N.D.          | 0.569% |                                |
| <b>WQK</b>          | <b>First</b> | <b>Second</b> | <b>Third</b> | <b>Fourth</b> |        | <b>TCPI<sub>20=25/31</sub></b> |
| 'CAIRAAGQGAYEQY'    | 0.848%       | 0.446%        | 0.723%       | 0.863%        |        | Yes                            |
| 'CASELVTGELF'       | 0.166%       | 0.312%        | 0.143%       | 0.106%        |        | Yes                            |
| 'CASGPPGFSGELF'     | 0.021%       | 0.342%        | 0.021%       | N.D.          |        |                                |
| 'CASRGLAGTSDTQY'    | 0.753%       | 0.804%        | 0.239%       | 0.329%        |        | Yes                            |
| 'CASRLTGGSTEAF'     | 6.013%       | 2.434%        | 4.452%       | 4.988%        |        | Yes                            |
| 'CASRPPGSTYNEQF'    | 0.147%       | 0.206%        | 0.320%       | 0.317%        |        | Yes                            |
| 'CASRRRGAMETQY'     | 0.145%       | 0.149%        | 0.262%       | 0.472%        |        | Yes                            |
| 'CASSFPQVVGFPGYT'   | N.D.         | 0.003%        | 0.370%       | N.D.          |        |                                |
| 'CASSIGDLEQF'       | 0.168%       | 0.508%        | 0.075%       | 0.211%        |        | Yes                            |
| 'CASSLAYGQVGDGYT'   | 0.927%       | 0.937%        | 1.140%       | 1.156%        |        | Yes                            |
| 'CASSLLYFGRQNTGELF' | 1.301%       | 1.869%        | 1.578%       | 1.686%        |        | Yes                            |
| 'CASSLRGYSNPQH'     | 0.381%       | 0.196%        | 0.114%       | N.D.          |        |                                |
| 'CASSPEGFETQY'      | 12.876%      | 13.516%       | 16.628%      | 24.914%       |        | Yes                            |
| 'CASSPGTVYGYT'      | 0.336%       | 0.269%        | 0.291%       | 0.190%        |        | Yes                            |
| 'CASSPPGGGPKNIQY'   | 1.059%       | 1.141%        | 1.038%       | 0.872%        |        | Yes                            |
| 'CASSPRAAGLTYEQY'   | 0.468%       | 0.144%        | 0.143%       | 0.080%        |        | Yes                            |
| 'CASSPTGATEAF'      | 2.407%       | 1.986%        | 2.878%       | 3.750%        |        | Yes                            |
| 'CASSQDRRDNPQH'     | 8.498%       | 13.820%       | 7.978%       | 7.209%        |        | Yes                            |
| 'CASSQGGNLEQF'      | 0.600%       | 1.739%        | 1.564%       | 1.860%        |        | Yes                            |
| 'CASSQGGNSYEQY'     | 0.742%       | 2.154%        | 2.091%       | 2.783%        |        | Yes                            |
| 'CASSRLYPGTDPDGYT'  | 0.070%       | 0.136%        | 0.071%       | 0.437%        |        | Yes                            |
| 'CASSYGNIQY'        | 0.755%       | 0.022%        | N.D.         | N.D.          |        |                                |
| 'CASSYGPGHGEQY'     | 0.436%       | 0.141%        | 0.328%       | 0.321%        |        | Yes                            |
| 'CASSYGTGRTGELF'    | 2.326%       | 2.059%        | 2.737%       | 2.344%        |        | Yes                            |

|                        |        |        |        |        |     |
|------------------------|--------|--------|--------|--------|-----|
| 'CASSYSGYGYT'          | 0.032% | 0.693% | 0.033% | N.D.   |     |
| 'CASSYYGGRADTQY'       | 0.389% | 0.467% | 1.094% | 1.255% | Yes |
| 'CATSDLVGDTP'          | N.D.   | 0.005% | 1.560% | 0.024% |     |
| 'CATSVSSGRHTGELF'      | 0.096% | 0.120% | 0.162% | 0.433% | Yes |
| 'CSARARRLAGGPDHAPDTQY' | 0.525% | 0.405% | 0.451% | 0.454% | Yes |
| 'CSARDGIGRVGDQPQH'     | 0.427% | 0.462% | 0.469% | 0.316% | Yes |
| 'CSARVPRTGSTGNTIY'     | 0.512% | 0.951% | 0.557% | 0.633% | Yes |

| <b>WSQ</b>          | <b>First</b> | <b>Second</b> | <b>Third</b> |  | <b>TCPI<sub>20=26/27</sub></b> |
|---------------------|--------------|---------------|--------------|--|--------------------------------|
| 'CASSAEGPGLDTPDTQY' | 0.080%       | 0.276%        | 0.604%       |  | Yes                            |
| 'CASSDGRRADEQF'     | 0.439%       | 0.619%        | 1.202%       |  | Yes                            |
| 'CASSFSAGTGDEQF'    | 0.581%       | 0.478%        | 0.964%       |  | Yes                            |
| 'CASSFSGSADTQY'     | 0.205%       | 0.782%        | 2.892%       |  | Yes                            |
| 'CASSGTGGAETQY'     | 0.547%       | 0.349%        | 0.231%       |  | Yes                            |
| 'CASSLEQGARTDTQY'   | 0.330%       | 0.456%        | 0.611%       |  | Yes                            |
| 'CASSLETRTGELF'     | 1.356%       | N.D.          | N.D.         |  |                                |
| 'CASSLGETQY'        | 0.450%       | 0.467%        | 0.572%       |  | Yes                            |
| 'CASSLGQGGAPQH'     | 0.626%       | 0.456%        | 0.379%       |  | Yes                            |
| 'CASSLQGYNEQF'      | 6.071%       | 4.135%        | 4.467%       |  | Yes                            |
| 'CASSLTLTGNTAEF'    | 25.379%      | 39.351%       | 26.877%      |  | Yes                            |
| 'CASSPWRDSGANVLT'   | 0.849%       | 0.675%        | 0.649%       |  | Yes                            |
| 'CASSQESAGSAYNEQF'  | 0.171%       | 0.467%        | 0.334%       |  | Yes                            |
| 'CASSQSGQPQH'       | 0.182%       | 0.619%        | 0.649%       |  | Yes                            |
| 'CASSQKLTGELF'      | 0.456%       | 0.186%        | 0.418%       |  | Yes                            |
| 'CASSRGGWETQY'      | 0.626%       | 0.338%        | 1.015%       |  | Yes                            |
| 'CASSRLAGLADTQY'    | 1.190%       | 0.793%        | 1.459%       |  | Yes                            |
| 'CASSRQGAGPRETQY'   | 0.399%       | 0.596%        | 0.668%       |  | Yes                            |
| 'CASSRRSGSGNEQF'    | 1.008%       | 1.243%        | 1.324%       |  | Yes                            |
| 'CASSSLGTGGSRETQY'  | 0.604%       | 0.478%        | 0.656%       |  | Yes                            |
| 'CASSSWSSGTDTPDTQY' | 0.370%       | 0.208%        | 0.141%       |  | Yes                            |
| 'CASSVGTSGELF'      | 5.245%       | 4.962%        | 3.952%       |  | Yes                            |
| 'CASSVQGAGPRETQY'   | 1.213%       | 0.467%        | 0.790%       |  | Yes                            |
| 'CASSYPGQEA'        | 0.820%       | 0.664%        | 0.559%       |  | Yes                            |
| 'CASSYSLSVGEKLF'    | 0.228%       | 0.714%        | 0.810%       |  | Yes                            |
| 'CASWDHSYEQY'       | 0.273%       | 0.236%        | 0.810%       |  | Yes                            |
| 'CATDTSGGSSSETQY'   | 0.427%       | 0.388%        | 0.276%       |  | Yes                            |

| <b>WXJ</b>        | <b>First</b> | <b>Second</b> | <b>Third</b> | <b>Fourth</b> | <b>TCPI<sub>20=32/58</sub></b> |
|-------------------|--------------|---------------|--------------|---------------|--------------------------------|
| 'CAAETGGYEQY'     | 0.026%       | 0.005%        | 0.214%       | N.D.          |                                |
| 'CASEPGLGYFAGELF' | 0.371%       | 0.022%        | 0.035%       | 0.085%        | Yes                            |
| 'CASHGYSRADSGLF'  | 0.019%       | 0.312%        | 0.076%       | N.D.          |                                |
| 'CASKKDLSTYEQY'   | 2.116%       | 0.544%        | 0.700%       | 0.449%        | Yes                            |
| 'CASKRGTGYTGELF'  | 0.098%       | N.D.          | 0.006%       | 0.522%        |                                |
| 'CASLRGYREKLF'    | N.D.         | N.D.          | N.D.         | 0.623%        |                                |
| 'CASNEDRRSSYNEQF' | 0.468%       | 0.013%        | N.D.         | 0.003%        |                                |



|                     |        |        |        |        |     |
|---------------------|--------|--------|--------|--------|-----|
| 'CASNRGLSPYNEQF'    | 0.021% | N.D.   | 0.164% | N.D.   |     |
| 'CASRFTSAGNEQF'     | 0.001% | 0.045% | 0.074% | 0.809% | Yes |
| 'CASRLGAAAYGYT'     | 0.414% | 0.043% | 0.140% | 0.427% | Yes |
| 'CASRMTSGRGETQY'    | 0.002% | 0.141% | 0.024% | 0.076% | Yes |
| 'CASRPTDSHQPH'      | 0.672% | 0.105% | 0.078% | 0.361% | Yes |
| 'CASRRLAGTYEQY'     | 0.621% | 0.056% | 0.159% | 0.417% | Yes |
| 'CASSALTGELF'       | N.D.   | N.D.   | 0.153% | N.D.   |     |
| 'CASSDLSLAKNIQY'    | N.D.   | N.D.   | N.D.   | 0.402% |     |
| 'CASSEDSMNTEAF'     | 0.051% | 0.013% | 0.151% | N.D.   |     |
| 'CASSEGQGGGETQY'    | 0.006% | 0.076% | 0.024% | 0.755% | Yes |
| 'CASSETSYPNEQF'     | 0.008% | N.D.   | 0.162% | N.D.   |     |
| 'CASSFLDREMETHY'    | 6.282% | 0.533% | 1.036% | 0.447% | Yes |
| 'CASSFNPLAVVEQY'    | 0.502% | 0.036% | 0.109% | 0.563% | Yes |
| 'CASSFSDRTYSYEQY'   | 0.001% | 0.152% | 0.030% | 0.018% | Yes |
| 'CASSFTGGPVEQY'     | 0.006% | 0.004% | 0.166% | N.D.   |     |
| 'CASSISGISYNEQF'    | 5.101% | 0.265% | 0.541% | 0.705% | Yes |
| 'CASSLASYEQY'       | 1.073% | 0.134% | 0.135% | 0.710% | Yes |
| 'CASSLDWGAGQPQH'    | 0.048% | 0.007% | N.D.   | 0.552% |     |
| 'CASSLFTGGSGNTIY'   | 0.551% | 0.027% | 0.030% | 0.093% | Yes |
| 'CASSLGGGSSYEQY'    | 3.064% | 0.199% | 0.157% | 0.357% | Yes |
| 'CASSLGLPGNNEQF'    | 0.051% | 0.002% | 0.330% | N.D.   |     |
| 'CASSLIQGGGNEQF'    | 0.029% | 0.141% | 0.026% | 0.813% | Yes |
| 'CASSLQGSNTEAF'     | N.D.   | N.D.   | N.D.   | 8.663% |     |
| 'CASSLVAGPAYNEQF'   | 0.011% | 0.167% | 0.028% | 0.040% | Yes |
| 'CASSLVGGKSSYEQY'   | 0.448% | 0.040% | 0.042% | 0.142% | Yes |
| 'CASSPAGVGQPQH'     | 0.026% | 0.004% | 0.246% | N.D.   |     |
| 'CASSPDQDYQPQH'     | 0.418% | 0.042% | 0.030% | 0.003% | Yes |
| 'CASSPGENEQF'       | 0.061% | N.D.   | 0.183% | 0.001% |     |
| 'CASSPGGAPNEQF'     | 0.002% | 0.013% | 0.009% | 0.364% | Yes |
| 'CASSPGSGFAGELF'    | 0.004% | 0.130% | 0.009% | 0.015% | Yes |
| 'CASSPYPGQGAHQPH'   | N.D.   | N.D.   | N.D.   | 0.459% |     |
| 'CASSQAQGLGYT'      | 0.261% | 0.060% | 0.017% | 0.721% | Yes |
| 'CASSQEPGLAGVKDTQY' | 0.834% | 0.031% | 0.009% | 0.015% | Yes |
| 'CASSQGLAGNEQY'     | 0.020% | 0.004% | 0.153% | N.D.   |     |
| 'CASSQGTGTATGELF'   | 0.026% | 0.397% | 0.022% | 0.019% | Yes |
| 'CASSQGTSGTTGELF'   | 0.006% | 0.256% | 0.044% | 0.040% | Yes |
| 'CASSRGDVQETQY'     | 0.001% | 0.159% | 0.028% | 0.017% | Yes |
| 'CASSRSAETQY'       | N.D.   | 0.129% | 0.052% | 0.028% |     |
| 'CASSTGTSGSEQY'     | 0.005% | 0.007% | 0.242% | N.D.   |     |
| 'CASSVSSYNEQF'      | N.D.   | N.D.   | N.D.   | 1.276% |     |
| 'CASSWTSPLDEQY'     | 0.030% | N.D.   | 0.342% | N.D.   |     |
| 'CASSYGGGASYEQY'    | 1.598% | 0.170% | 0.295% | 0.197% | Yes |
| 'CASSYIGSSYNEQF'    | N.D.   | 0.149% | 0.007% | 0.071% |     |

| 'CASSYLDSYGYT'    | N.D.         | 0.201%        | 0.015%       | 0.082%        |                                |
|-------------------|--------------|---------------|--------------|---------------|--------------------------------|
| 'CASSYSEGPYGYT'   | N.D.         | 0.109%        | N.D.         | 0.060%        |                                |
| 'CASSYSTNTEAF'    | 0.469%       | 0.060%        | 0.017%       | 0.082%        | Yes                            |
| 'CASTMLAKNTGELF'  | 0.001%       | 0.266%        | 0.054%       | 0.033%        | Yes                            |
| 'CASTNDGTGNTYEQY' | 0.456%       | 0.105%        | 0.384%       | 3.944%        | Yes                            |
| 'CATFKGDRKAF'     | 0.998%       | 0.060%        | 0.024%       | 0.006%        | Yes                            |
| 'CATRGGGGGETQY'   | 0.027%       | 0.002%        | 0.201%       | N.D.          |                                |
| 'CSAPSGINYEQY'    | 0.553%       | 0.007%        | 0.004%       | 0.011%        | Yes                            |
| <b>XRL</b>        | <b>First</b> | <b>Second</b> | <b>Third</b> | <b>Fourth</b> | <b>TCPI<sub>20=27/65</sub></b> |
| 'CAISEGDSPYEQY'   | 0.054%       | N.D.          | N.D.         | 0.408%        |                                |
| 'CAIESTRNQPQH'    | 0.155%       | N.D.          | N.D.         | 0.729%        |                                |
| 'CAISMDEF'        | 0.034%       | 0.015%        | 0.021%       | 0.243%        | Yes                            |
| 'CASGDRGFYNEQF'   | N.D.         | N.D.          | 0.474%       | 0.016%        |                                |
| 'CASGLSEGGNQPQH'  | 0.857%       | 0.420%        | 0.197%       | 0.172%        | Yes                            |
| 'CASIELSYSNQPQH'  | 0.189%       | 0.110%        | 0.044%       | 0.141%        | Yes                            |
| 'CASKAGTSVYGEQF'  | N.D.         | 0.226%        | 0.018%       | 0.008%        |                                |
| 'CASKKGQGGTEAF'   | N.D.         | 0.017%        | 1.256%       | 0.251%        |                                |
| 'CASLDRGLQPQH'    | 0.013%       | 0.005%        | 0.801%       | 0.227%        | Yes                            |
| 'CASMRTSAPDTQY'   | N.D.         | 0.391%        | 0.060%       | 0.024%        |                                |
| 'CASQSRGMTF'      | N.D.         | N.D.          | N.D.         | 0.329%        |                                |
| 'CASRDAGDYWEQY'   | 0.398%       | 0.120%        | 0.133%       | 0.110%        | Yes                            |
| 'CASRPGTETYEQY'   | 1.363%       | 0.023%        | 0.008%       | N.D.          |                                |
| 'CASRPSRGGGYGYT'  | N.D.         | 1.660%        | 0.147%       | 0.047%        |                                |
| 'CASRRDYSYNEQF'   | 0.007%       | 0.013%        | 0.575%       | 0.055%        | Yes                            |
| 'CASRTGTSDHEQY'   | 0.297%       | 0.367%        | 0.370%       | 0.243%        | Yes                            |
| 'CASSAGRMGTDTQY'  | N.D.         | N.D.          | 2.199%       | 0.024%        |                                |
| 'CASSDPYRGEPQH'   | 0.020%       | 0.012%        | 0.707%       | 0.133%        | Yes                            |
| 'CASSFMDRNEKLF'   | N.D.         | 1.175%        | 0.116%       | 0.031%        |                                |
| 'CASSIEQNTEAF'    | 0.533%       | 0.017%        | N.D.         | N.D.          |                                |
| 'CASSLAGVGQETQY'  | 0.526%       | 0.181%        | 0.174%       | 0.102%        | Yes                            |
| 'CASSLDDAETDTQY'  | N.D.         | 4.840%        | 0.072%       | 0.055%        |                                |
| 'CASSLEQNTEAF'    | 0.634%       | 0.010%        | N.D.         | N.D.          |                                |
| 'CASSLGQGRDTQY'   | 3.069%       | 0.632%        | 0.763%       | 1.520%        | Yes                            |
| 'CASSLGVTSYSEQY'  | 0.459%       | 0.012%        | 0.003%       | N.D.          |                                |
| 'CASSLRLTLLNEQF'  | 0.040%       | 0.024%        | 0.031%       | 0.415%        | Yes                            |
| 'CASSLSGHDIYEQY'  | N.D.         | 0.246%        | 0.014%       | 0.016%        |                                |
| 'CASSLTDTQY'      | 0.027%       | 0.017%        | 0.844%       | 0.204%        | Yes                            |
| 'CASSLTTRIDEQY'   | 1.025%       | 0.457%        | 0.441%       | 0.439%        | Yes                            |
| 'CASSLVPGYDQPQH'  | 0.243%       | 0.029%        | 0.028%       | N.D.          |                                |
| 'CASSPGLAGYGYT'   | N.D.         | 0.610%        | 0.093%       | N.D.          |                                |
| 'CASSPGQGAHSYEQY' | N.D.         | N.D.          | 1.471%       | N.D.          |                                |
| 'CASSPGQGYGYT'    | N.D.         | 0.004%        | 0.811%       | 0.172%        |                                |
| 'CASSPNGGYGYT'    | N.D.         | 0.294%        | N.D.         | N.D.          |                                |

|                         |              |               |              |        |                                |
|-------------------------|--------------|---------------|--------------|--------|--------------------------------|
| 'CASSPQGANGYT'          | N.D.         | 0.619%        | 0.086%       | N.D.   |                                |
| 'CASSPQGASGYT'          | N.D.         | 0.350%        | 0.034%       | N.D.   |                                |
| 'CASSPQKAAAYRPDSGANVLT' | N.D.         | N.D.          | 0.942%       | 0.016% |                                |
| 'CASSPRGSGSESANVLT'     | 0.013%       | 0.001%        | N.D.         | 0.948% |                                |
| 'CASSPSTGLYNEQF'        | N.D.         | N.D.          | N.D.         | 0.235% |                                |
| 'CASSQAGTGFVEQY'        | 0.432%       | 0.581%        | 0.300%       | 0.517% | Yes                            |
| 'CASSQAGTGWDTEAF'       | 0.013%       | 8.523%        | 0.038%       | 0.047% | Yes                            |
| 'CASSQDGYGANVLT'        | 0.040%       | N.D.          | N.D.         | 0.400% |                                |
| 'CASSQDRSSTDTQY'        | N.D.         | N.D.          | 0.730%       | N.D.   |                                |
| 'CASSQEEVPYNEQF'        | N.D.         | N.D.          | 9.734%       | 0.039% |                                |
| 'CASSQGQVSNTAF'         | N.D.         | N.D.          | 1.104%       | N.D.   |                                |
| 'CASSQGTSSGDTQY'        | N.D.         | N.D.          | 0.716%       | 0.008% |                                |
| 'CASSQPGRQAF'           | N.D.         | N.D.          | 0.688%       | 0.008% |                                |
| 'CASSQYDNEQY'           | 0.148%       | 0.145%        | 0.266%       | 0.690% | Yes                            |
| 'CASSSPGSPSYNEQF'       | N.D.         | 0.231%        | 0.005%       | N.D.   |                                |
| 'CASSSRLAGGSETQY'       | 0.013%       | 0.025%        | 0.093%       | 0.415% | Yes                            |
| 'CASSSRLAGGTDQY'        | 0.216%       | 0.130%        | 0.216%       | 3.072% | Yes                            |
| 'CASSTRLAGGTDQY'        | 0.020%       | 0.025%        | 0.092%       | 0.964% | Yes                            |
| 'CASSVAWDGNQPQH'        | 0.358%       | 0.207%        | 0.121%       | 0.016% | Yes                            |
| 'CASSWTGPYEQY'          | N.D.         | 0.233%        | 0.018%       | N.D.   |                                |
| 'CASSYNGAYNEQF'         | 0.189%       | 0.126%        | 0.122%       | 0.094% | Yes                            |
| 'CASSYSEGVSPNTEAF'      | N.D.         | 0.023%        | 1.756%       | 0.274% |                                |
| 'CASSYSTGQGRSTDTQY'     | 0.715%       | 0.011%        | 0.008%       | 0.125% | Yes                            |
| 'CASSYYDPSVNTGELF'      | 9.019%       | 0.090%        | 0.031%       | 0.016% | Yes                            |
| 'CASSYYPGRGNEQF'        | 0.783%       | 0.306%        | 0.324%       | 0.329% | Yes                            |
| 'CASTATGAADTQY'         | 0.108%       | 0.078%        | 0.073%       | 0.243% | Yes                            |
| 'CATKAGTSVNEQF'         | N.D.         | 0.500%        | 0.026%       | N.D.   |                                |
| 'CATSEHPGGFSQY'         | 0.027%       | 0.008%        | 1.146%       | 0.118% | Yes                            |
| 'CATSGLAGETQY'          | N.D.         | N.D.          | 0.627%       | N.D.   |                                |
| 'CSASGTDYNEQF'          | N.D.         | 0.005%        | 0.548%       | 0.016% |                                |
| 'CVAKGPPNEQF'           | 0.600%       | 0.168%        | 0.243%       | 0.204% | Yes                            |
| <b>YYS</b>              | <b>First</b> | <b>Second</b> | <b>Third</b> |        | <b>TCPI<sub>20=27/27</sub></b> |
| 'CAISESTRNQPQH'         | 0.245%       | 0.375%        | 0.077%       |        | Yes                            |
| 'CASGPGGSGANVLT'        | 0.677%       | 0.135%        | 0.618%       |        | Yes                            |
| 'CASLGTGTSGSYEQY'       | 1.512%       | 0.595%        | 0.206%       |        | Yes                            |
| 'CASRGRGMDGYT'          | 0.797%       | 0.491%        | 0.472%       |        | Yes                            |
| 'CASRLAGGPGDTQY'        | 7.184%       | 2.710%        | 8.779%       |        | Yes                            |
| 'CASRTGGAGEAF'          | 13.502%      | 8.437%        | 18.227%      |        | Yes                            |
| 'CASRTRGAGEAF'          | 1.532%       | 0.863%        | 2.019%       |        | Yes                            |
| 'CASSGGSSAAGEQF'        | 0.495%       | 0.275%        | 0.756%       |        | Yes                            |
| 'CASSGRGSSSYEQY'        | 0.392%       | 0.550%        | 0.112%       |        | Yes                            |
| 'CASSKTSGSGDEQF'        | 0.966%       | 1.150%        | 1.168%       |        | Yes                            |
| 'CASSLAGSGANVLT'        | 1.431%       | 1.431%        | 1.752%       |        | Yes                            |

|                    |              |               |              |                                |
|--------------------|--------------|---------------|--------------|--------------------------------|
| 'CASSLLVSGTYEQY'   | 0.192%       | 0.485%        | 0.026%       | Yes                            |
| 'CASSLPGVFGETQY'   | 3.387%       | 2.950%        | 5.463%       | Yes                            |
| 'CASSLTGDLYEQY'    | 0.535%       | 0.965%        | 1.280%       | Yes                            |
| 'CASSLYLPTDTQY'    | 0.001%       | 0.035%        | 1.709%       | Yes                            |
| 'CASSPNRGPPNEKLF'  | 0.882%       | 1.050%        | 1.014%       | Yes                            |
| 'CASSPTGSAYPGSCF'  | 0.267%       | 0.267%        | 0.438%       | Yes                            |
| 'CASSPTGVGIPGELF'  | 3.709%       | 3.117%        | 9.560%       | Yes                            |
| 'CASSQNQGAGGNQPQH' | 0.916%       | 1.142%        | 2.766%       | Yes                            |
| 'CASSSGTTYEQY'     | 1.922%       | 0.406%        | 0.558%       | Yes                            |
| 'CASSSLGGQETQY'    | 0.590%       | 0.246%        | 0.369%       | Yes                            |
| 'CASSSLTSGRQETQY'  | 0.669%       | 0.234%        | 0.163%       | Yes                            |
| 'CASTNVGTGSNEQF'   | 0.103%       | 0.200%        | 0.412%       | Yes                            |
| 'CASTTSGSQEQY'     | 0.793%       | 0.744%        | 0.120%       | Yes                            |
| 'CATSRGAGRQETQY'   | 0.514%       | 1.345%        | 6.751%       | Yes                            |
| 'CATSSGPSNTEAF'    | 3.603%       | 1.210%        | 2.963%       | Yes                            |
| 'CVSMDGNTGELF'     | 2.522%       | 1.558%        | 3.058%       | Yes                            |
| <b>ZHF</b>         | <b>First</b> | <b>Second</b> | <b>Third</b> | <b>TCPI<sub>20</sub>=19/50</b> |
| 'CASEPRDRGWNEQF'   | 0.408%       | 0.013%        | 0.003%       | Yes                            |
| 'CASFGNTVLYGYT'    | 0.498%       | N.D.          | N.D.         |                                |
| 'CASGQPQH'         | 0.476%       | 0.316%        | 0.049%       | Yes                            |
| 'CASGTGGSGANVLT'   | 0.048%       | 0.337%        | 0.003%       | Yes                            |
| 'CASGTSSEQF'       | N.D.         | 0.283%        | N.D.         |                                |
| 'CASNAGVWDEQF'     | 0.339%       | N.D.          | N.D.         |                                |
| 'CASSAAGNTEAF'     | 0.339%       | N.D.          | N.D.         |                                |
| 'CASSAFFEDEAF'     | 0.005%       | 1.210%        | 0.570%       | Yes                            |
| 'CASSDFIGHGYEQY'   | 0.312%       | N.D.          | N.D.         |                                |
| 'CASSDNQETQY'      | 0.386%       | N.D.          | N.D.         |                                |
| 'CASSEGREPQH'      | N.D.         | 0.197%        | 2.074%       |                                |
| 'CASSESTYRSYNEQF'  | 0.402%       | 0.002%        | 0.003%       | Yes                            |
| 'CASSFVRGDRDDTQY'  | N.D.         | 0.373%        | 2.375%       |                                |
| 'CASSKLSGRGELF'    | 0.048%       | 0.528%        | 7.912%       | Yes                            |
| 'CASSLEGTATKNIQY'  | N.D.         | 0.077%        | 1.377%       |                                |
| 'CASSLGQNQPQH'     | N.D.         | 0.092%        | 2.922%       |                                |
| 'CASSLLAGENYNEQF'  | N.D.         | 0.706%        | N.D.         |                                |
| 'CASSLSIGCCGYT'    | N.D.         | 0.362%        | 0.332%       |                                |
| 'CASSLTGYNEQF'     | 0.053%       | 0.266%        | 0.106%       | Yes                            |
| 'CASSPDRGYNEQF'    | N.D.         | 0.427%        | 0.001%       |                                |
| 'CASSPGENEQF'      | 0.498%       | 0.082%        | 0.009%       | Yes                            |
| 'CASSPGLHNEQF'     | N.D.         | 1.003%        | N.D.         |                                |
| 'CASSPGTSGTGSYEQY' | 0.005%       | 0.071%        | 0.834%       | Yes                            |
| 'CASSPLFLPSSYNEQF' | 0.720%       | 1.051%        | 0.666%       | Yes                            |
| 'CASSPSRTGGENEQF'  | 0.423%       | 0.004%        | N.D.         |                                |
| 'CASSQDAGGYTGELF'  | 0.328%       | N.D.          | N.D.         |                                |

|                    |        |        |         |     |
|--------------------|--------|--------|---------|-----|
| 'CASSQGQRFVTEAF'   | N.D.   | 0.176% | 2.816%  |     |
| 'CASSQGRGTGETEAF'  | N.D.   | 0.153% | 1.713%  |     |
| 'CASSQTTGIQRAF'    | N.D.   | 0.013% | 1.046%  |     |
| 'CASSSFTSGSPDTQY'  | 0.312% | N.D.   | N.D.    |     |
| 'CASSSGQALTEAF'    | N.D.   | 0.147% | 0.764%  |     |
| 'CASSSGTAGQPQH'    | 0.386% | N.D.   | N.D.    |     |
| 'CASSSLDGDTTYEQY'  | N.D.   | 0.278% | 0.896%  |     |
| 'CASSSQGNTEAF'     | N.D.   | 0.023% | 0.699%  |     |
| 'CASSTGHPNTEAF'    | N.D.   | 0.017% | 0.711%  |     |
| 'CASSTQTGGYGYT'    | N.D.   | 0.054% | 2.266%  |     |
| 'CASSTSGTGLRGYT'   | 0.529% | N.D.   | N.D.    |     |
| 'CASSVGLLETGELF'   | 0.042% | 1.357% | 0.007%  | Yes |
| 'CASSVGLYNEQF'     | 0.487% | 2.881% | 0.004%  | Yes |
| 'CASSYETGGNEQF'    | 0.148% | 0.601% | 0.624%  | Yes |
| 'CASSYGGLYNEQF'    | 0.413% | 0.008% | 0.003%  | Yes |
| 'CASSYGQGAGGYT'    | 0.630% | 1.026% | 0.335%  | Yes |
| 'CASSYLREYEQF'     | 0.053% | 0.574% | 0.734%  | Yes |
| 'CASSYPQGKLF'      | 0.386% | 0.013% | 0.001%  | Yes |
| 'CASSYSGAGGLQETQY' | 0.318% | 0.065% | 0.001%  | Yes |
| 'CASTTLSYSNQPQH'   | N.D.   | 0.442% | 0.738%  |     |
| 'CASYDGLTTEAF'     | N.D.   | N.D.   | 0.749%  |     |
| 'CATSRLAGEEQF'     | 0.037% | 2.691% | 17.683% | Yes |
| 'CAVRGSISTGELF'    | N.D.   | 0.027% | 0.965%  |     |
| 'CSASPQSYEQY'      | N.D.   | 0.036% | 0.709%  |     |

---
